# Supplementary material for: Fluorescence studies of protein thermostability in ionic liquidsElectronic supplementary information (ESI) available: synthesis of [C4mpy][Tf2N]. See http://www.rsc.org/suppdata/cc/b4/b401304m/
Source: Royal Society of Chemistry journal article supplement (doi:10.1039/b401304m), 2004-01-01
Supplement: b401304m.doc [file b401304m.doc]

**Electronic Supplementary Information**

**Synthesis of 1-butyl-1-methylpyrrolidinium bis(trifluoromethane sulfonyl)imide**

All reactions and manipulations were performed in a nitrogen atmosphere using standard Schlenk techniques. The synthesis of 1-butyl-1-methylpyrrolidinium bis(trifluoromethane sulfonyl)imide, [C4mpy][Tf2N], as described by MacFarlane et al.1 was modified slightly. Under dry nitrogen, freshly distilled 1-bromobutane (105 cm3, 0.97 mol) was added over 30 min with a dropping funnel to vigorously stirred 1-methylpyrrolidine (100 cm3, 0.95 mol) in a 500 cm3 round bottom flask on an ice bath. The entire reaction vessel was covered with anodized aluminum foil at all times to retard any photodecomposition pathways. The reaction mixture was then slowly warmed to room temperature and allowed to react for 24 h. The resulting crude white to off-white precipitate was collected by filtration and washed with cold ethyl acetate (6 × 30 cm3). Solvent was initially removed on a rotary evaporator at 50 °C followed by further drying on a vacuum line for 24 h to afford [C4mpy]Br in approximately 90% yield.

At this point 123 g of the [C4mpy]Br (0.55 mol) was dissolved in 200 cm3 deionized 18.2 Mcm Chelex 100-treated water. Due to the frequent appearance of a light straw color, the aqueous [C4mpy]Br solution was stirred with a small amount of 50-200 mesh activated carbon overnight after which the carbon was removed by serial centrifugation vacuum filtration using a fine ceramic frit and sometimes filtration using a 0.2 μm syringe filter. This step was repeated once to give a completely colorless aqueous [C4mpy]Br solution. *It is essential that any colored impurities [which incidentally result from polymeric products] be removed at this stage as they become quite infrangible once the ionic liquid is formed.* Lithium bis(trifluoromethane sulfonyl)imide (161 g, 0.56 mol) dissolved in a minimal amount of water was then added dropwise under stirring to the filtered aqueous [C4mpy]Br solution on ice. This mixture was stirred at room temperature overnight. The dense lower ionic liquid layer was then collected using a separatory funnel and repeatedly extracted with water (15 × 150 cm3) to remove LiBr and other water-soluble impurities or unreacted starting materials. The cleaned organic layer was then dried at room temperature for a week under vacuum to afford the [C4mpy][Tf2N] as a colorless, odorless free-flowing liquid. *Caveat: we noted that the use of commercial celite or alumina in cleanup/drying steps resulted in marked increases in ultraviolet absorption and luminescence from our ionic liquids.* Simply eliminating these from our prep reduced the fluorescence background by 5-fold or more.

Prior to sample preparation, small batches of ionic liquid were individually flash frozen in liquid nitrogen and lyophilized for 96 h (Labconco, Freeze-dry/Freezone 4.5) to reduce the water content as low as possible.

**References**

1. D. R. MacFarlane, P. Meakin, J. Sun, N. Amini and M. Forsyth, *J. Phys. Chem. B*, 1999, **103**, 4164-4170.
